# Supplementary material for: The sludge loading rate regulates the growth and release of heterotrophic bacteria resistant to six types of antibiotics in wastewater activated sludge
Source: Royal Society of Chemistry journal article supplement (doi:10.1039/c4em00197d), 2014-12-02
Supplement: c4em00197d1.pdf [file c4em00197d1.pdf]

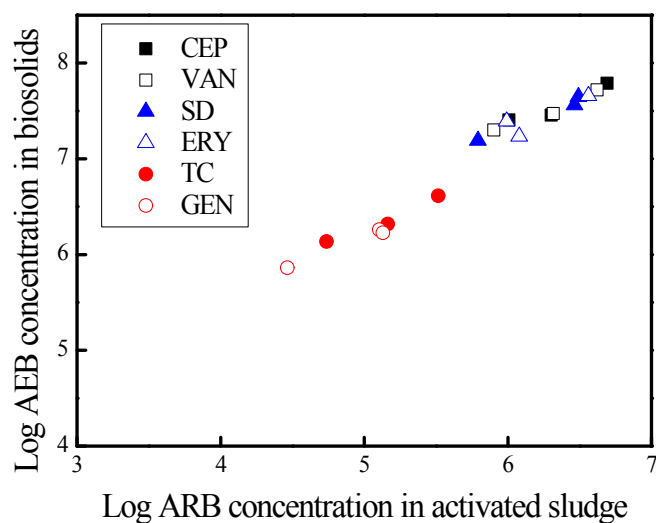

Fig. S1. Relevance between log concentration of various ARB in the activated sludge and in biosolids.

CEP, VAN, SD, ERY, TC and GEN and represent cephalalexin-, vancomycin-, sulfadiazine-, erythromycin-, tetracycline- and gentamicin- resistant heterotrophic bacteria, respectively

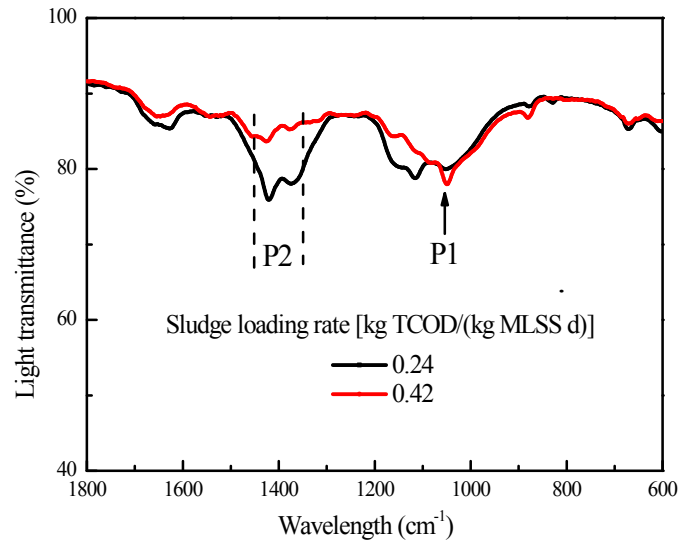

Fig. S2. Infrared spectroscopy analysis of activated sludge at two different sludge loading rates. The peak 1 (P1, 1040 cm<sup>-1</sup>) represents polysaccharide, while peak 2 (P2, 1350–1450 cm<sup>-1</sup>) represents protein peptides. Polysaccharide and protein were the two major constituents of extracellular polymeric substance (EPS). A higher ratio of polysaccharide/protein was found at the higher sludge loading rate (0.42 kg COD/(kg MLSS·d)), indicating that the composition of the EPS had changed.

Table S1. Physical and chemical indexes of the three reactors.

| Reactor  | Activated sludge                         |                |           | TCOD<br>(mg/L) | FCOD<br>(mg/L) | Turbidity<br>(NTU) | NH <sub>4</sub> <sup>+</sup> -N<br>(mg/L) | TN<br>(mg/L) | TP<br>(mg/L) |
|----------|------------------------------------------|----------------|-----------|----------------|----------------|--------------------|-------------------------------------------|--------------|--------------|
|          | Sludge loading rate [kg COD/(kg MLSS·d)] | MLSS<br>(mg/L) | PH        |                |                |                    |                                           |              |              |
| Influent | –                                        | –              | 7.36~8.29 | 259~438        | 118~290        | 65.0~240.0         | 25.8~39.5                                 | 32.0~45.0    | 5.8~12.5     |
| A        | 0.24                                     | 1000           | 7.24~7.54 | 19~52          | 8~30           | 6.9~14.5           | 0.1~1.2                                   | 23.6~43.8    | 3.5~8.9      |
| B        | 0.42                                     | 1167           | 7.13~7.49 | 22~47          | 6~32           | 4.3~15.2           | 0.1~1.5                                   | 21.5~42.6    | 3.8~7.6      |
| C        | 0.61                                     | 1293           | 7.18~7.58 | 21~60          | 6~30           | 4.6~16.8           | 0.1~1.2                                   | 21.5~44.5    | 2.9~8.3      |

Table S2 Total release loads ( $RL_{total}$ ) of various ARB in the activated sludge system at different sludge loading rates

| Sludge loading rate [kg TCOD/(kg MLSS·d)] | CEP               | VAN               | SD                | ERY               | TC                | GEN               |
|-------------------------------------------|-------------------|-------------------|-------------------|-------------------|-------------------|-------------------|
| 0.24                                      | $4.9 \times 10^7$ | $3.9 \times 10^7$ | $3.0 \times 10^7$ | $4.8 \times 10^7$ | $2.7 \times 10^6$ | $1.4 \times 10^6$ |
| 0.42                                      | $9.8 \times 10^7$ | $1.0 \times 10^8$ | $1.5 \times 10^8$ | $5.9 \times 10^7$ | $7.2 \times 10^6$ | $6.3 \times 10^6$ |
| 0.61                                      | $2.4 \times 10^8$ | $2.1 \times 10^8$ | $1.4 \times 10^8$ | $1.8 \times 10^8$ | $1.6 \times 10^7$ | $6.8 \times 10^6$ |
